# Supplementary material
Source: HighWire-hosted journal article supplement (https://bjo.bmj.com/content/107/9/1395)
Supplement: inline-supplementary-material-1 [file inline-supplementary-material-1.pdf]

Supplementary Table 1. Questionnaire before the training

| Question                                                                                                                                                                                                | Answer                                                                                                    |
|---------------------------------------------------------------------------------------------------------------------------------------------------------------------------------------------------------|-----------------------------------------------------------------------------------------------------------|
| 1. Do you have any experiences performing ocular surgeries under a microscope?                                                                                                                          | <input type="checkbox"/> Yes<br><br><input type="checkbox"/> No<br><br><input type="checkbox"/> Not clear |
| 2. If yes, please give a rough estimation of the total hours you have spent on it                                                                                                                       | _____ hours<br><br><input type="checkbox"/> Not Clear                                                     |
| 3. What is your confidence level with the following practice tasks that will be performed on the porcine eyes?                                                                                          | From 1-10; 1=least confidence, 10= highest confidence.<br><br>1 2 3 4 5 6 7 8 9 10                        |
| 4. Now, if you have an opportunity to be a first assistant for the surgeon to finish an ocular surgery, and what is your confidence level to finish your task without extra assistance from other ones? | From 1-10; 1=least confidence, 10= highest confidence.<br><br>1 2 3 4 5 6 7 8 9 10                        |

|                                                                                                                                                                       |                                                                                                                                                                               |
|-----------------------------------------------------------------------------------------------------------------------------------------------------------------------|-------------------------------------------------------------------------------------------------------------------------------------------------------------------------------|
| 5. Which kind of teaching modulator do you prefer to when you START your learning of practice under a microscope?                                                     | <input type="checkbox"/> Fruits<br><br><input type="checkbox"/> AR modulator<br><br><input type="checkbox"/> Porcine eyes                                                     |
| 6. Which one of the following factors do you consider the most important for you to strengthen your confidence with the coming tasks as an assistant for the surgeon? | <input type="checkbox"/> Enough time of modulator practice<br><br><input type="checkbox"/> Enough mentor instruction<br><br><input type="checkbox"/> Enough clinical practice |

Supplementary Table 2 Questionnaire after training

| Question                                                                                                                                                                                               | Answer                                                                             |
|--------------------------------------------------------------------------------------------------------------------------------------------------------------------------------------------------------|------------------------------------------------------------------------------------|
| 1. What is your interest level with the training model you have received?                                                                                                                              | From 1-10; 1=least interest, 10= highest interest.<br><br>1 2 3 4 5 6 7 8 9 10     |
| 2. Now, since you have received 4 hours of micromanipulation training. With the current method, you think you can withstand the possibility of training for more than 4 hours.                         | From 1-5; 1=strongly disagree, 5=strongly agree<br><br>1 2 3 4 5                   |
| 3. Now, since you have received 4 hours of micromanipulation training. With this method, you are willing to receive more training?                                                                     | From 1-5; 1=strongly disagree, 5=strongly agree<br><br>1 2 3 4 5                   |
| 4. What is your confidence level with the following practice tasks will be performed on the porcine eyes?                                                                                              | From 1-10; 1=least confidence, 10= highest confidence.<br><br>1 2 3 4 5 6 7 8 9 10 |
| 5. Now, if you have an opportunity to be a first-assistant for the surgeon to finish a ocular surgery, and what is your confidence level to finish your task without extra assistance from other ones? | From 1-10; 1=least confidence, 10= highest confidence.<br><br>1 2 3 4 5 6 7 8 9 10 |

6. Which one of the following factors do you consider the most important for you to strengthen your confidence with the coming tasks as an assistant for the surgeon?

Enough time of modulator practice

Enough mentor instruction

Enough clinical practice
